# Supplementary material for: Value of magnetic resonance imaging indices of left renal vein entrapment in the diagnosis of nutcracker syndrome in children
Source: PubMed Central journal article supplement — Transl Pediatr. 2021 May;10(5):1285–93. doi: 10.21037/tp-20-466 (PMC8192989; doi:10.21037/tp-20-466), 2021-05
Supplement: tp-10-05-1285-dss.pdf [file tp-10-05-1285-dss.pdf]

## Data Sharing Statement

|                     |                                                                                                                                                     |                                                                                                                              |
|---------------------|-----------------------------------------------------------------------------------------------------------------------------------------------------|------------------------------------------------------------------------------------------------------------------------------|
| <b>Article Info</b> | <a href="http://dx.doi.org/10.21037/tp-20-466">http://dx.doi.org/10.21037/tp-20-466</a>                                                             |                                                                                                                              |
| <b>Item</b>         | <b>Question</b>                                                                                                                                     | <b>Authors' Response<br/>(place "-" if not applicable)</b>                                                                   |
| 1                   | Would you like to share data collected for your study to others?                                                                                    | Yes                                                                                                                          |
| 2                   | If not, would you like to share the reason for your decision?                                                                                       | -                                                                                                                            |
| 3                   | What data in particular will be shared?                                                                                                             | The clinical data in particular will be shared.                                                                              |
| 4                   | Any other documents will be shared? Such as study protocol, statistical analysis plan, informed consent form, clinical study report, analytic code. | Statistical analysis plan, informed consent form, and clinical study report will also be shared if requested.                |
| 5                   | When will data availability begin?                                                                                                                  | From the publication date.                                                                                                   |
| 6                   | When will data availability end?                                                                                                                    | Two years within the publication date.                                                                                       |
| 7                   | To whom will you share the data?                                                                                                                    | Nephrologist for children who are interested in studies of NCS.                                                              |
| 8                   | For what type of analysis or purpose?                                                                                                               | To evaluate the clinical value of magnetic resonance imaging (MRI) indices of the LRV in the diagnosis of children with NCS. |
| 9                   | How or where can the data/documents be obtained?                                                                                                    | Emails could be sent to the address below to obtain the shared data:<br>1547132442@qq.com.                                   |
| 10                  | Any other restrictions?                                                                                                                             | We may balance the potential benefits and risks for each request and then provide the data that could be shared.             |
